# Supplementary material
Source: PubMed Central journal article supplement (PMC4481325)
Supplement: NIHMS693749-supplement-1.pdf [file NIHMS693749-supplement-1.pdf]

## **Appendix 2: Clinical vignettes for sample cases**

**Patient 1** (GE junction case): 36 year-old man diagnosed with uT3N0, Siewert 2 adenocarcinoma with squamous features, starting 41cm from incisors and extending into the GE junction and cardia.

**Patient 2** (distal esophagus case): 59 year-old man diagnosed with uT3N1 adenocarcinoma of the distal esophagus, 33-39cm from incisors, with involved gastrohepatic node.

**Patient 3** (proximal esophagus case): 78 year-old man diagnosed with uT3N1 squamous cell carcinoma, 25-30cm from incisors, with involved upper paratracheal node.

### **Instructions to panelists:**

- 1) Referring to the provided diagnostic PET-CT images (and ignoring the provided GTV), contour what you would consider GTV.
- 2) Then, using the provided GTV, contour your CTV using the guidelines from the CALGB 80803 protocol. Assume that all patients will receive 5040cGy in 28 fractions with concurrent chemotherapy (either carboplatin/paclitaxel or FOLFOX).
