# Supplementary material
Source: PubMed Central journal article supplement (PMC4481325)
Supplement: NIHMS693749-supplement-2.pdf [file NIHMS693749-supplement-2.pdf]

## Appendix 1: CALGB 80803 protocol treatment volumes (section 8.3.3)

**GTV:** The GTV is based on the pre-chemotherapy extent of disease using the initial PET/CT scan, endoscopy report, and CT scan. The entire esophageal wall, including any disease that has extended through the wall should be contoured as the GTV as well as any PET/CT-avid or enlarged lymph nodes.

**CTV:** The intent of pre-operative treatment is to include the tumor bed plus the nodal groups at risk (whether clinically positive or negative). The clinical target volume (CTV) should encompass the peri-esophageal lymph nodes, mediastinal lymph nodes for mid- and upper- thoracic esophageal tumors, and the submucosal spread longitudinally along the esophagus. This is generally a 3-4 cm expansion on the GTV superiorly and inferiorly and 1.0 cm expansion radially. For distal esophageal tumors and GE junction tumors, the CTV should include the celiac lymph nodes. For tumors above the carina, the supraclavicular lymph nodes should be included in the CTV.
